# Supplementary material for: Nanostructured copper molybdates as promising bifunctional electrocatalysts for overall water splitting and CO2reduction
Source: Royal Society of Chemistry journal article supplement (doi:10.1039/d0ra07783f), 2020-01-01
Supplement: d0ra07783f1.pdf [file d0ra07783f1.pdf]

**Electronic Supplementary information**

**Nanostructured copper molybdates as promising bifunctional electrocatalysts for overall water splitting and CO<sub>2</sub> reduction**

Atefeh Rahmani<sup>1</sup>, Hossein Farsi<sup>\*1,2</sup>

1) *Department of Chemistry, University of Birjand, Birjand, Iran*

2) *Developing Nanomaterials for Environmental Protection Research Lab, University of Birjand, Birjand, Iran*

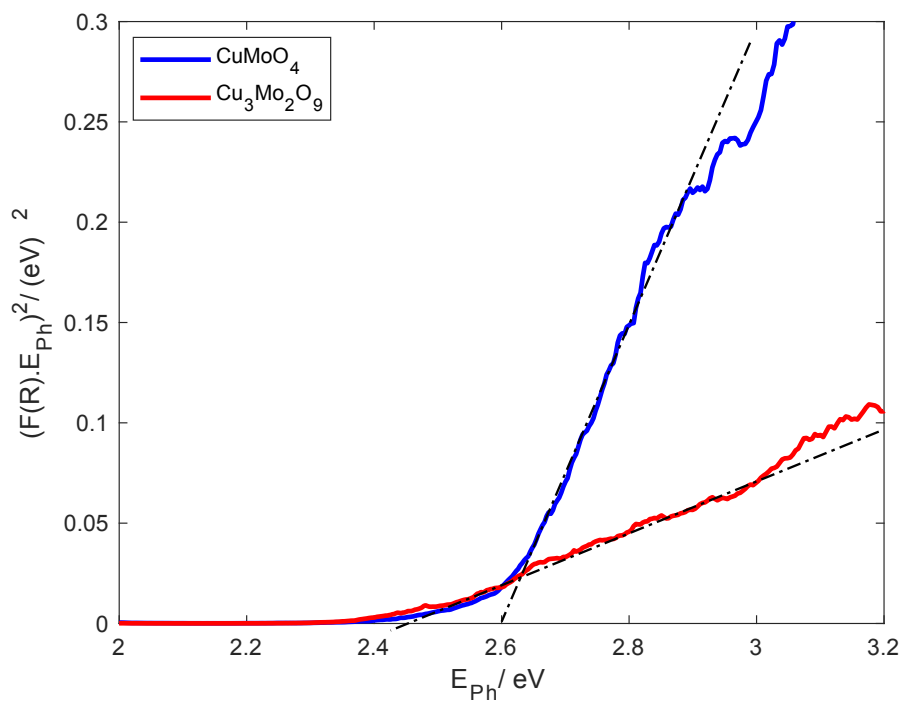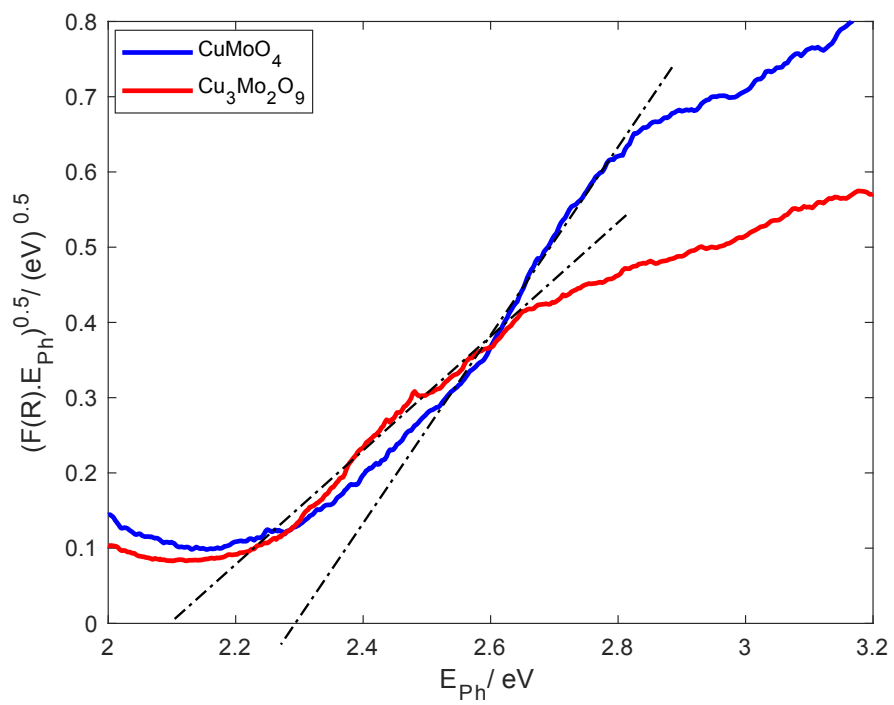

**Fig. S1.** Transformed DRS data for a) direct and b) indirect transitions.

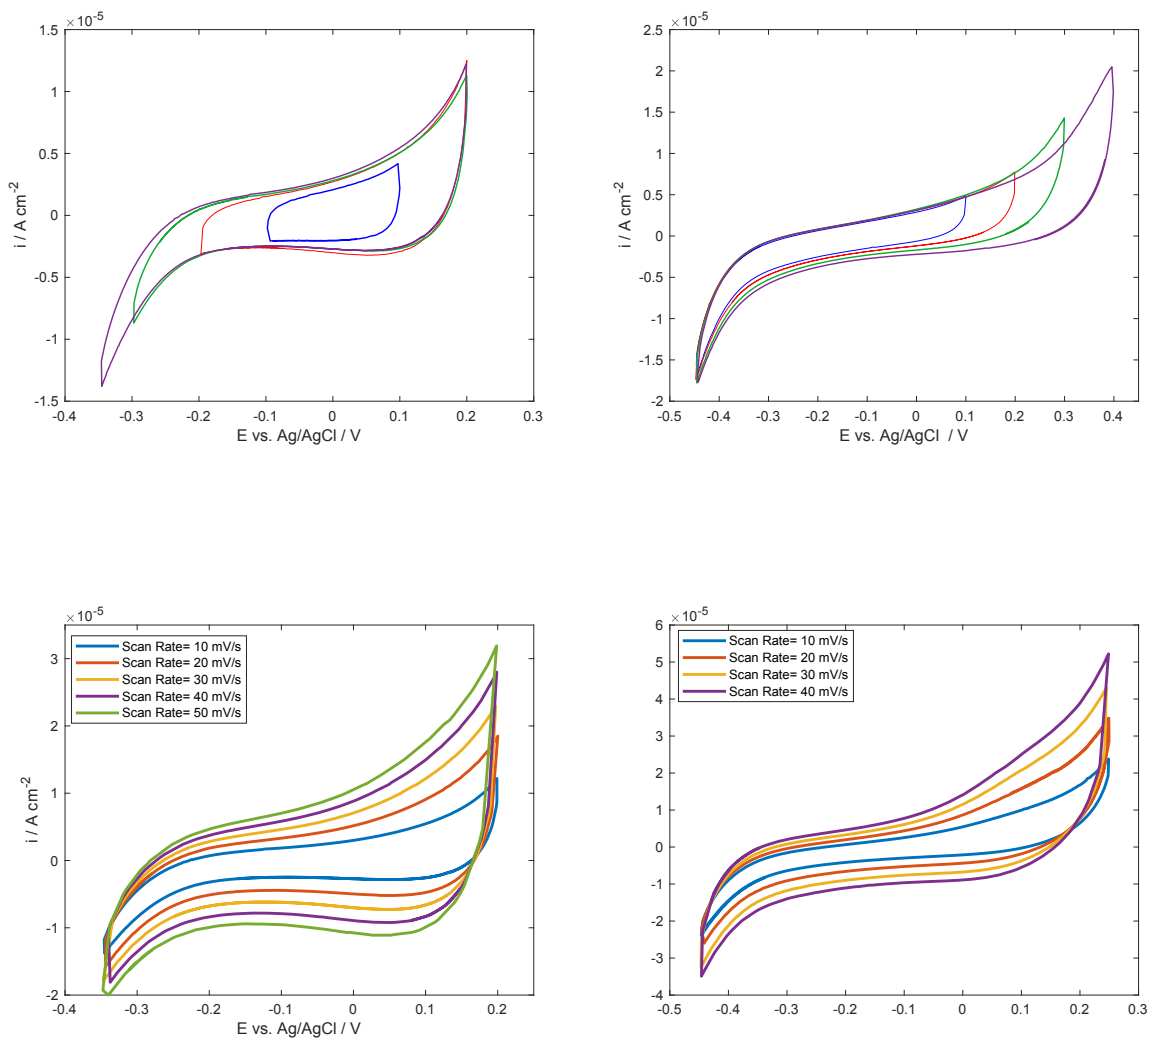

**Fig. S2.** Cyclic voltammograms of a, c)  $\text{CuMoO}_4$  and b, d)  $\text{Cu}_3\text{Mo}_2\text{O}_9$  at different end potentials and scan rates in 0.1 M NaOH.

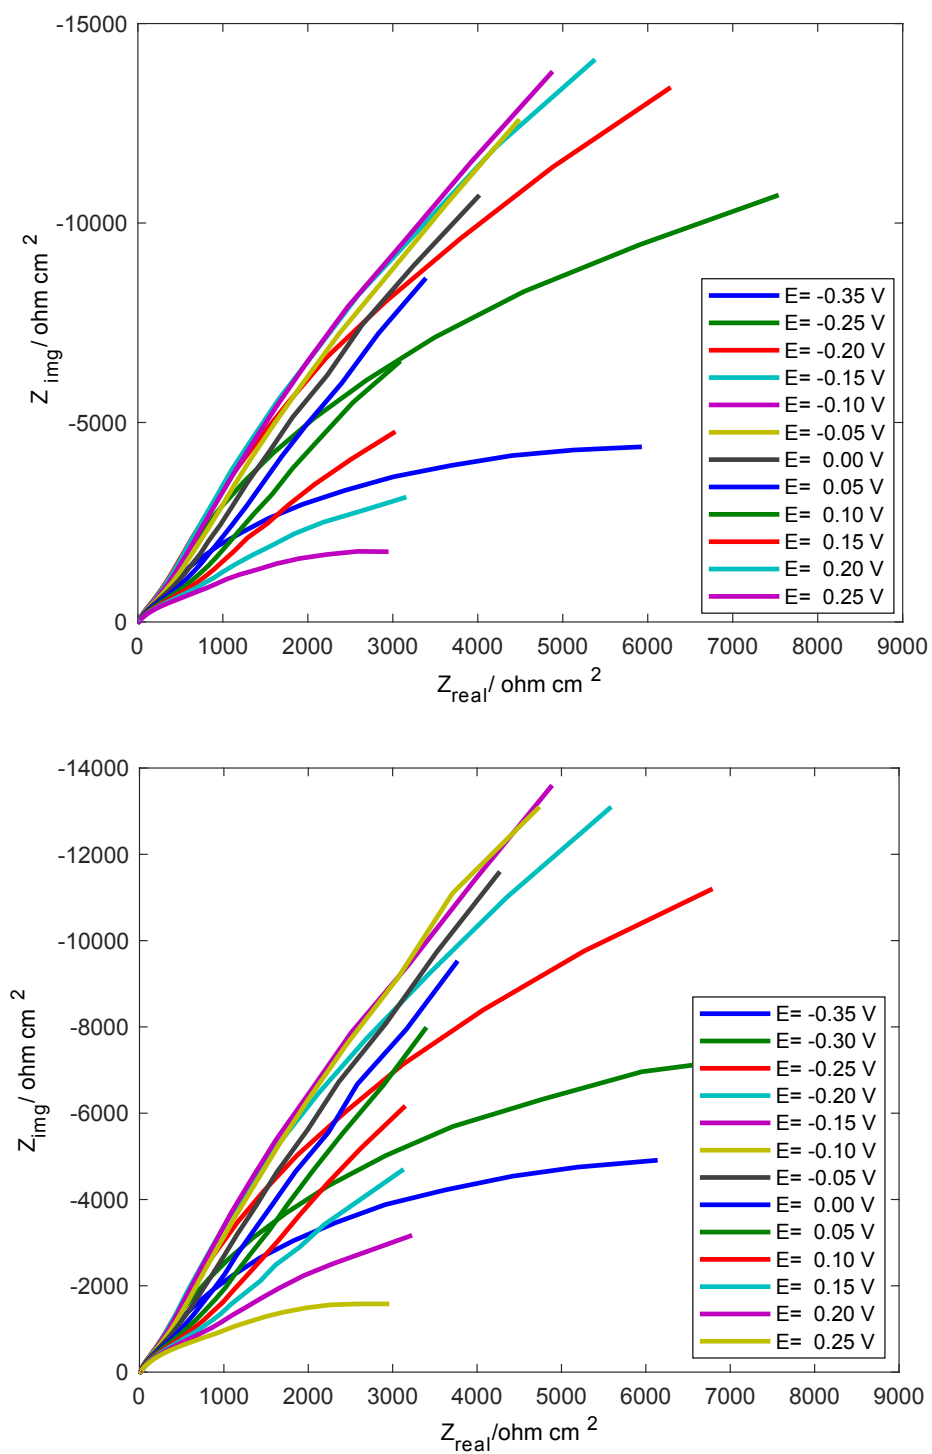

**Fig. S3.** Nyquist diagrams of nano-CuMoO<sub>4</sub> in 0.1 M NaOH for a) in the dark and b) under illumination.

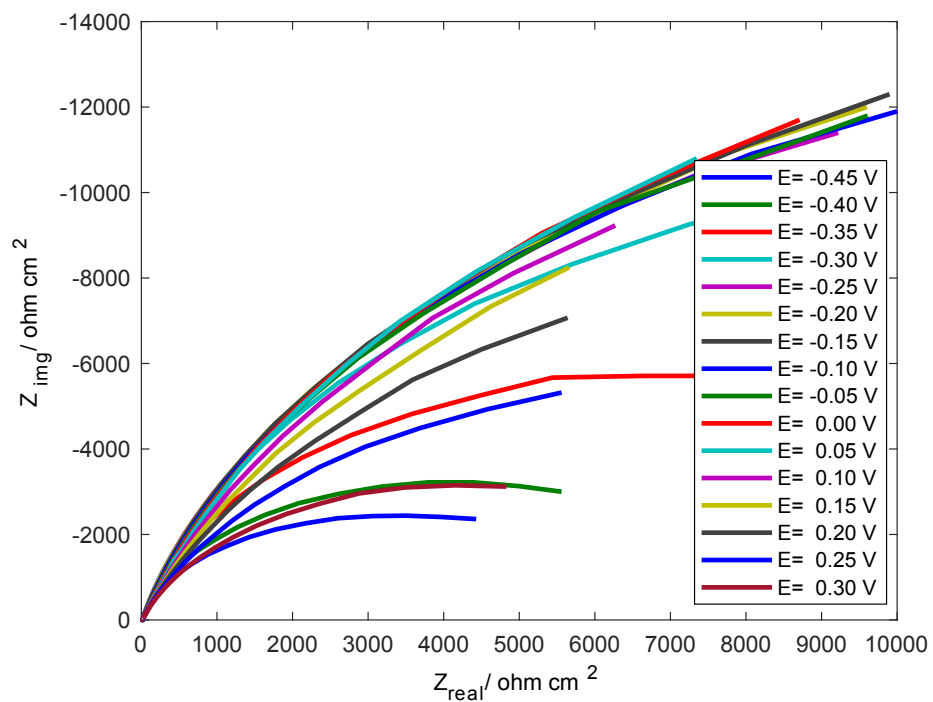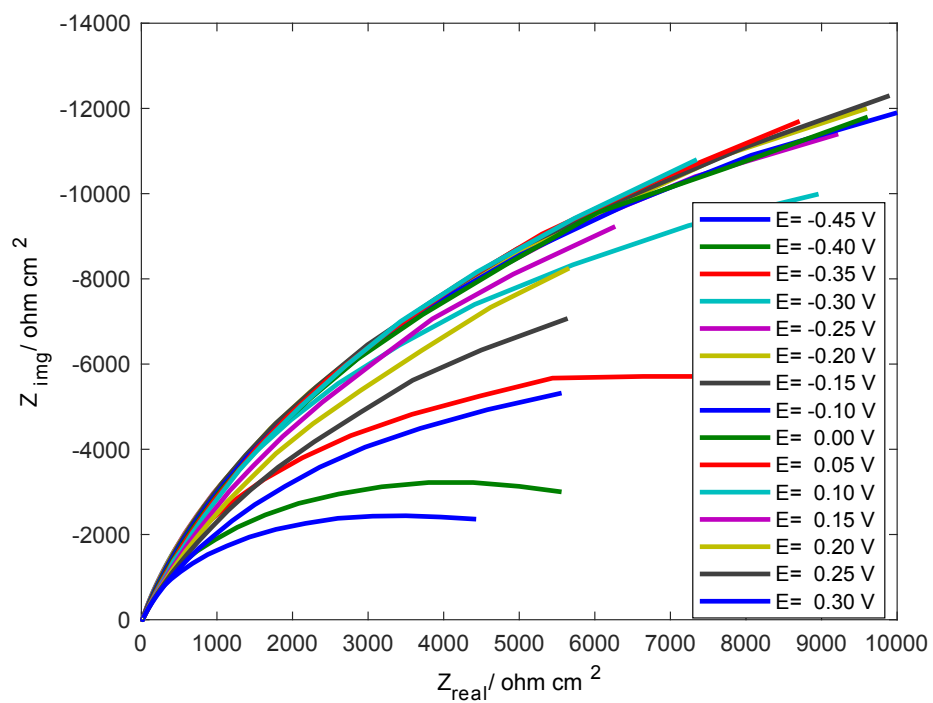

**Fig. S4.** Nyquist diagrams of nano- $\text{Cu}_3\text{Mo}_2\text{O}_9$  in 0.1 M NaOH for a) in the dark and b) under illumination.

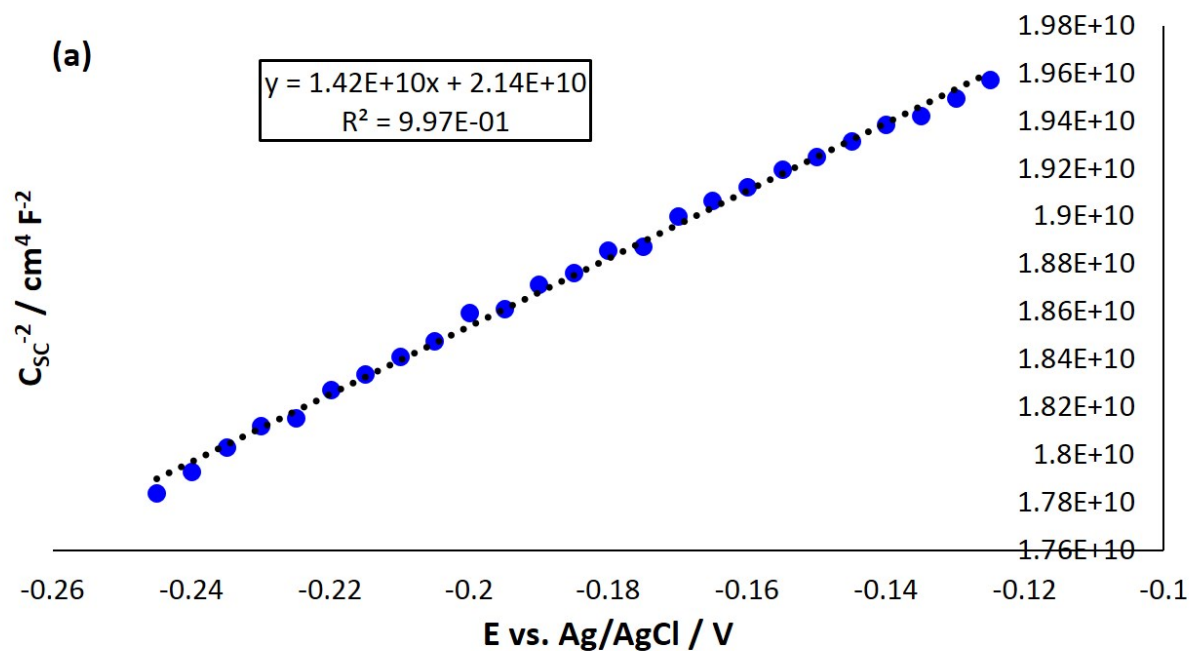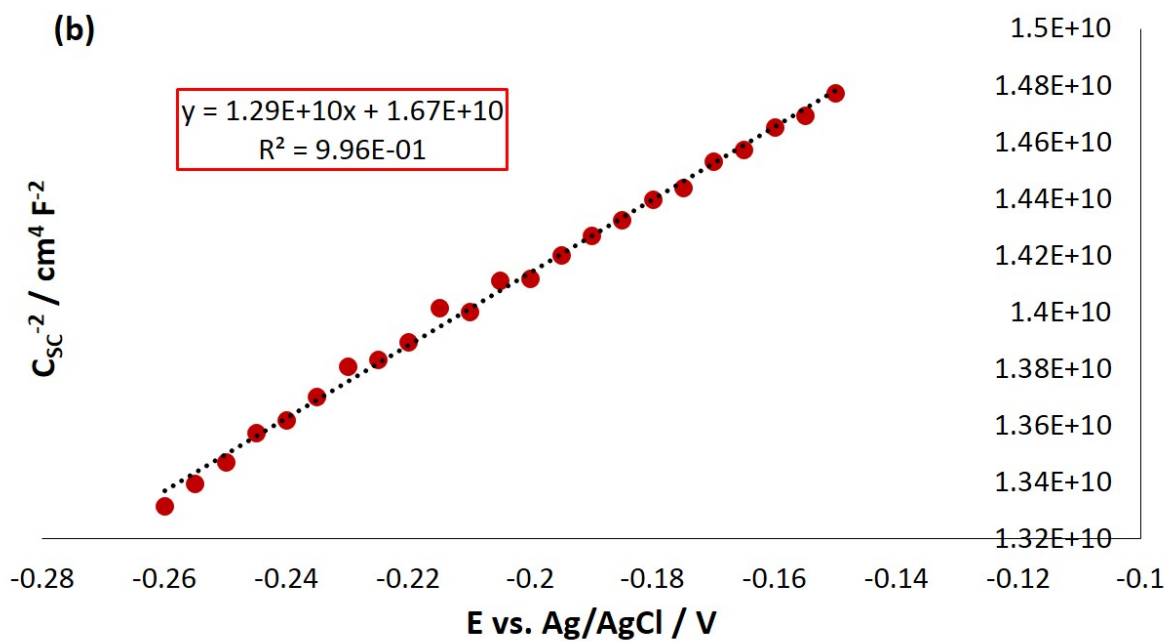

Fig. S5. Linear part of Mott-Schottky plot of nano-CuMoO<sub>4</sub> in 0.1 M NaOH for a) in the dark and b) under illumination.

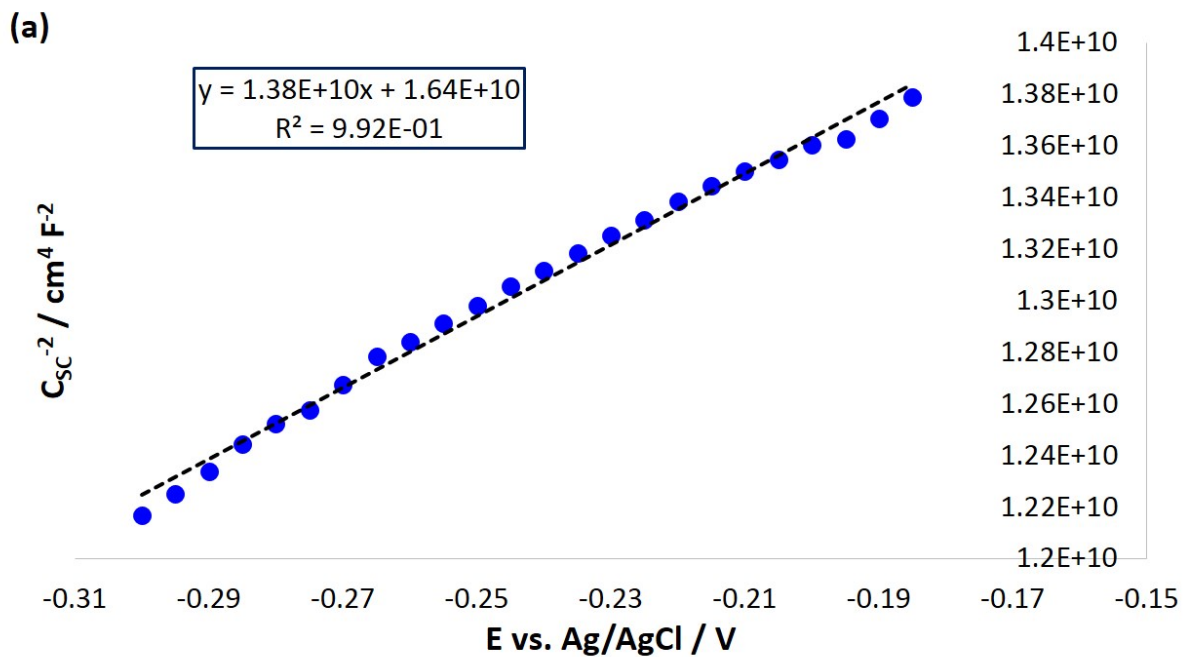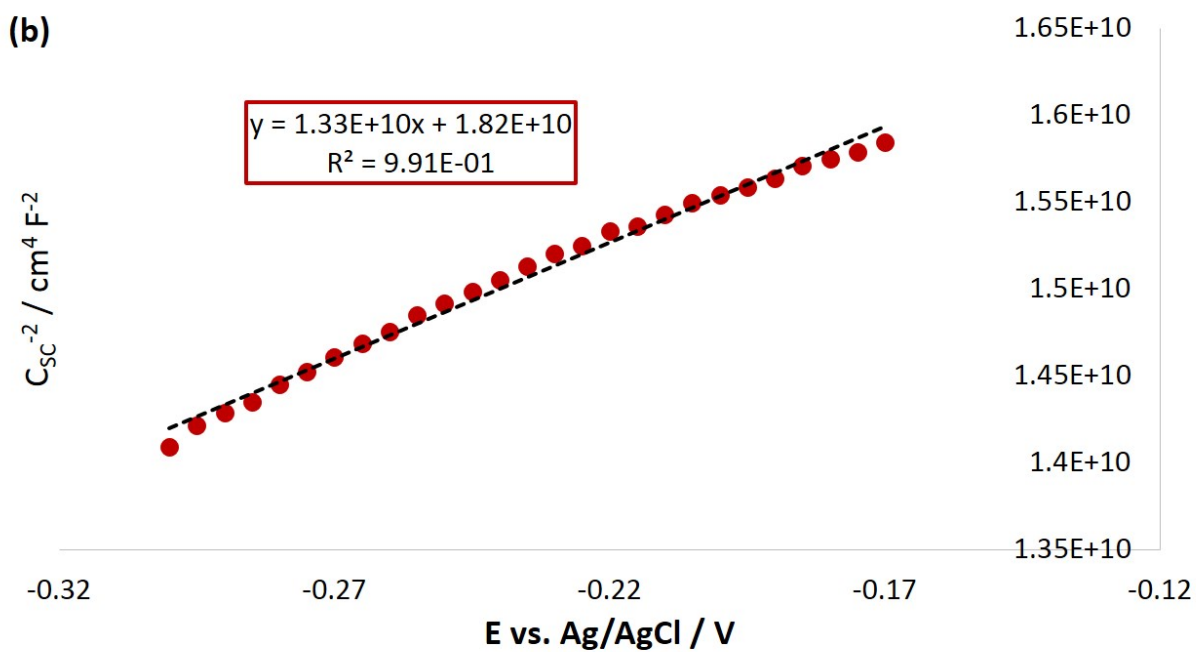

**Fig. S6.** Linear Mott-Schottky plot of nano- $\text{Cu}_3\text{Mo}_2\text{O}_9$  in 0.1 M NaOH for a) in the dark and b) under illumination.

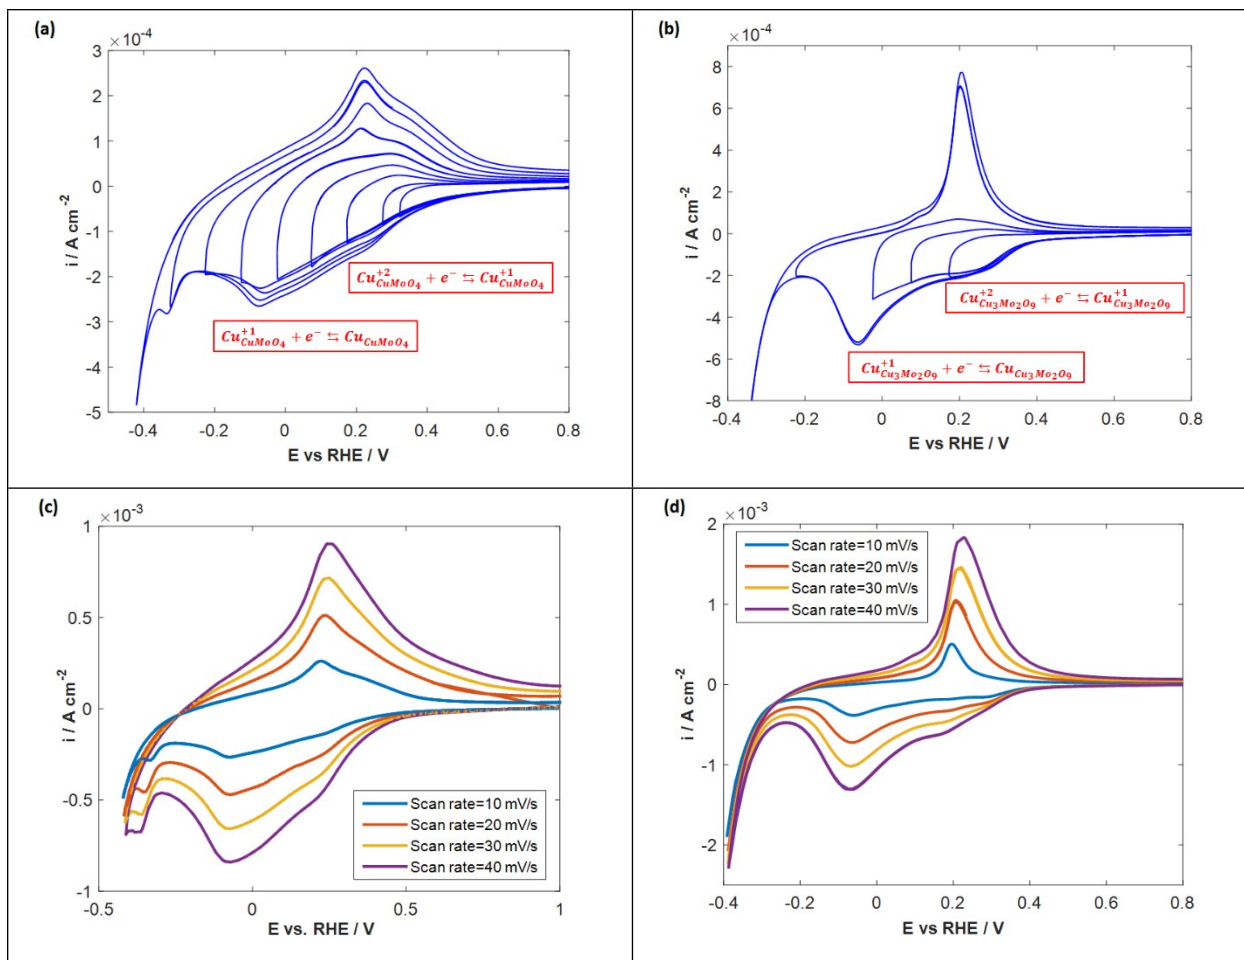

**Fig. S7.** Cyclic voltammograms with different end potentials for a)  $\text{CuMoO}_4$  and b)  $\text{Cu}_3\text{Mo}_2\text{O}_9$ , at different scan rates for c)  $\text{CuMoO}_4$  and d)  $\text{Cu}_3\text{Mo}_2\text{O}_9$ .



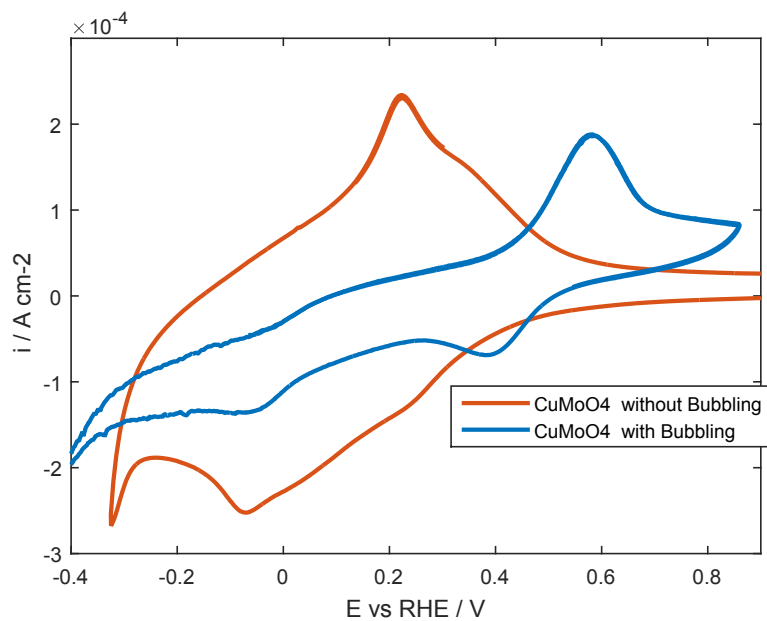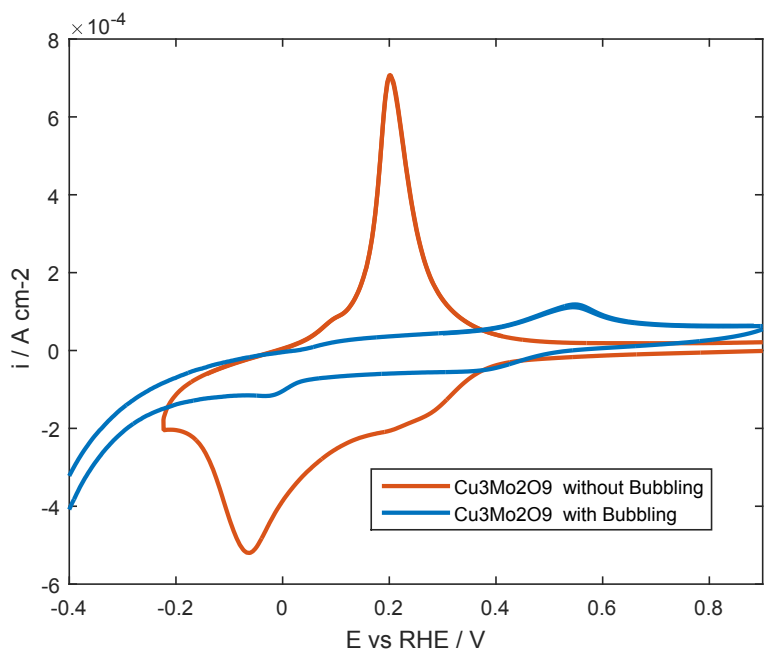

**Fig. S8.** Comparative CVs of a)  $\text{CuMoO}_4$ , and b)  $\text{Cu}_3\text{Mo}_2\text{O}_9$  in the presence and absence of  $\text{CO}_2$  dissolving species.
